# Supplementary material for: Tolerogenic Dendritic Cells Induce Apoptosis-Independent T Cell Hyporesponsiveness of SARS-CoV-2-Specific T Cells in an Antigen-Specific Manner
Source: MDPI journal article supplement (doi:10.3390/ijms232315201), 2022-12-02
Supplement: s1 [file s1]

## SUPPLEMENTARY MATERIAL

Supplementary table S1: Information on antibodies used in the current study. Specificity, fluorochrome, clone, reference number and company are provided for each antibody or dye used, when applicable.

| Marker                                                | Fluorochrome | Clone  | Reference number | Company                  |
|-------------------------------------------------------|--------------|--------|------------------|--------------------------|
| tolDC and convDC phenotype analysis                   |              |        |                  |                          |
| CD209                                                 | FITC         | DCN46  | 551264           | BD Pharmingen™           |
| HLA-DR                                                | PE           | L243   | 347401           | BD™                      |
| CD14                                                  | PerCP        | MφP9   | 345786           | BD™                      |
| CD80                                                  | PECy5        | L307.4 | 559370           | BD Pharmingen™           |
| CD83                                                  | FITC         | HB15e  | MHCD8301         | Life Technologies™       |
| CD86                                                  | PE           | IT2.2  | 555665           | BD Pharmingen™           |
| IgG isotype                                           | FITC         | X40    | 345815           | BD™                      |
| IgG isotype                                           | PE           | X40    | 345816           | BD™                      |
| IgG isotype                                           | PerCP        | X40    | 345817           | BD™                      |
| SARS-CoV-2-specific T cell sort                       |              |        |                  |                          |
| CD3                                                   | PerCPCy5.5   | UCHT1  | 300430           | Biolegend                |
| CD4                                                   | BV510        | RPA-T4 | 300546           | Biolegend                |
| CD8                                                   | PB           | SK1    | 344718           | Biolegend                |
| CD71                                                  | BV786        | M-A712 | 563768           | Biolegend                |
| CD98                                                  | BB515        | UM7F8  | 565103           | Biolegend                |
| LIVE/DEAD Fixable Near-IR Dead Cell Stain Kit         | NA           | NA     | L10119           | Thermo Fisher Scientific |
| DC – T cell coculture follow-up                       |              |        |                  |                          |
| CD3                                                   | PECy7        | UCHT1  | 563423           | Biolegend                |
| CD4                                                   | APC-H7       | RPA-T4 | 560158           | Biolegend                |
| CD8                                                   | PB           | SK1    | 344718           | ThermoFisher™            |
| Annexin-V                                             | APC          | NA     | 640941           | Biolegend                |
| CellEvent™ Caspase-3/7 Green Flow Cytometry Assay Kit | FITC         | NA     | C10427           | Invitrogen™              |
| Viability (Cytotflex)                                 |              |        |                  |                          |
| PI                                                    | NA           | NA     | P3566            | Thermo Fisher Scientific |

Supplementary table S2: Expression levels of cellular markers HLA-DR, CD80, CD83 and CD86 show a significant decrease in tolDC as shown by MFI values.

| Marker | Celltype | MFI ± SD                              | Decrease (%) ± SD (%) |
|--------|----------|---------------------------------------|-----------------------|
| HLA-DR | convDC   | $2.21 \cdot 10^6 \pm 7.08 \cdot 10^5$ | 73.47 ± 9.70          |
|        | tolDC    | $5.56 \cdot 10^5 \pm 2.21 \cdot 10^5$ |                       |
| CD80   | convDC   | $9.72 \cdot 10^4 \pm 3.20 \cdot 10^4$ | 57.79 ± 22.27         |
|        | tolDC    | $3.33 \cdot 10^4 \pm 1.56 \cdot 10^4$ |                       |
| CD83   | convDC   | $1.75 \cdot 10^5 \pm 2.71 \cdot 10^4$ | 69.54 ± 10.42         |
|        | tolDC    | $4.75 \cdot 10^4 \pm 1.48 \cdot 10^4$ |                       |
| CD86   | convDC   | $3.40 \cdot 10^6 \pm 5.35 \cdot 10^5$ | 65.68 ± 10.87         |
|        | tolDC    | $1.07 \cdot 10^6 \pm 2.71 \cdot 10^5$ |                       |

Supplementary table S3: longitudinal analysis of viable, early apoptotic, and late apoptotic SARS-CoV-2-specific T cells in DC-T cell cocultures as measured by Annexin-V and SYTOX AADvanced markers.

| Condition                                                      | Significance | P value |
|----------------------------------------------------------------|--------------|---------|
| <b>24h</b>                                                     |              |         |
| viable tolDC-T cell vs. viable convDC-T cell                   | ns           | >0.9999 |
| viable tolDC-T cell vs. viable T cell alone                    | ns           | 0.9990  |
| viable convDC-T cell vs. viable T cell alone                   | ns           | >0.9999 |
| early apoptosis tolDC-T cell vs. early apoptosis convDC-T cell | ns           | >0.9999 |
| early apoptosis tolDC-T cell vs. early apoptosis T cell alone  | ns           | 0.9506  |
| early apoptosis convDC-T cell vs. early apoptosis T cell alone | ns           | 0.9833  |
| late apoptosis tolDC-T cell vs. late apoptosis convDC-T cell   | ns           | >0.9999 |
| late apoptosis tolDC-T cell vs. late apoptosis T cell alone    | ns           | >0.9999 |
| late apoptosis convDC-T cell vs. late apoptosis T cell alone   | ns           | 0.9941  |
| <b>72h</b>                                                     |              |         |
| viable tolDC-T cell vs. viable convDC-T cell                   | ns           | 0.9852  |
| viable tolDC-T cell vs. viable T cell alone                    | ns           | 0.9989  |
| viable convDC-T cell vs. viable T cell alone                   | ns           | 0.7844  |
| early apoptosis tolDC-T cell vs. early apoptosis convDC-T cell | ns           | 0.9862  |
| early apoptosis tolDC-T cell vs. early apoptosis T cell alone  | ns           | 0.9815  |
| early apoptosis convDC-T cell vs. early apoptosis T cell alone | ns           | >0.9999 |
| late apoptosis tolDC-T cell vs. late apoptosis convDC-T cell   | ns           | 0.9973  |
| late apoptosis tolDC-T cell vs. late apoptosis T cell alone    | ns           | 0.9667  |
| late apoptosis convDC-T cell vs. late apoptosis T cell alone   | ns           | 0.6619  |
| <b>120h</b>                                                    |              |         |
| viable tolDC-T cell vs. viable convDC-T cell                   | ns           | 0.9979  |
| viable tolDC-T cell vs. viable T cell alone                    | ns           | 0.9987  |
| viable convDC-T cell vs. viable T cell alone                   | ns           | 0.8611  |
| early apoptosis tolDC-T cell vs. early apoptosis convDC-T cell | ns           | 0.8466  |
| early apoptosis tolDC-T cell vs. early apoptosis T cell alone  | ns           | 0.9981  |
| early apoptosis convDC-T cell vs. early apoptosis T cell alone | ns           | 0.6427  |
| late apoptosis tolDC-T cell vs. late apoptosis convDC-T cell   | ns           | >0.9999 |
| late apoptosis tolDC-T cell vs. late apoptosis T cell alone    | ns           | 0.9472  |
| late apoptosis convDC-T cell vs. late apoptosis T cell alone   | ns           | 0.9120  |

Supplementary table S4: longitudinal analysis of caspase expression by SARS-CoV-2-specific T cells in DC-T cell cocultures.

| Condition                      | Significance | P Value |
|--------------------------------|--------------|---------|
| <b>24h</b>                     |              |         |
| tolDC-T cell vs. convDC-T cell | ns           | 0.8468  |
| tolDC-T cell vs. T cell alone  | ns           | 0.9543  |
| convDC-T cell vs. T cell alone | ns           | 0.6822  |
| <b>72h</b>                     |              |         |
| tolDC-T cell vs. convDC-T cell | ns           | 0.2490  |
| tolDC-T cell vs. T cell alone  | ns           | 0.5761  |
| convDC-T cell vs. T cell alone | ns           | 0.0519  |
| <b>120h</b>                    |              |         |
| tolDC-T cell vs. convDC-T cell | ns           | 0.5092  |
| tolDC-T cell vs. T cell alone  | ns           | 0.7213  |
| convDC-T cell vs. T cell alone | ns           | 0.1014  |
